# Supplementary material for: Twin-plate ice nucleation assay (TINA) with infrared detection for high-throughput droplet freezing experiments with biological ice nuclei in laboratory and field samples
Source: Copernicus journal article supplement (doi:10.5194/amt-2018-230), 2018-07-24
Supplement: Supplementary file [file amt-2018-230-AC1-supplement.pdf]

1 **MS amt-2018-230, Kunert et al.: Twin-plate ice nucleation assay (TINA) with infrared**  
2 **detection for high-throughput droplet freezing experiments with biological ice nuclei in**  
3 **laboratory and field samples**  
4

5 We thank referee #1 for his comments, questions, and suggestions, which are highly appreciated  
6 and have been taken into account upon revision of our manuscript. The comments and our  
7 answers are listed below.  
8

9 [Referee comment: The authors should stress what is the scientific innovation in their instrument](#)  
10 [given the very recent paper of Harrison et al. \(2018\), which was mentioned shortly in the end](#)  
11 [of the introduction section.](#)

12 Author's response: TINA studies ice nucleation in 960 microliter range droplets in one  
13 experiment, which enables the analysis of many samples or dilution series with good statistics  
14 in a short period of time. The cooling system allows a fast and high-precision temperature  
15 control over a wide temperature range at variable cooling rates. The infrared detection is an  
16 efficient method to doubtlessly determine freezing events, which was first applied to droplet  
17 freezing assays by Zarogtas et al. 2016. As discussed by Grothe 2018 (doi:10.5194/amt-2018-  
18 177-RC3, 2018), the authors of Harrison et al. 2018 attended several workshops and  
19 conferences and also have been the organizers for one conference, where our Twin-plate ice  
20 nucleation assay (TINA) with infrared detection was presented and discussed, so that our new  
21 setup was well-known to them.  
22

23 [Referee comment: Also, why infrared detector enables improved detection over other methods?](#)

24 Author's response: The infrared detector monitors the temperature of each droplet during  
25 cooling. As soon as a droplet freezes, latent heat is released and a sharp signal can be detected.  
26 For clarification, we modified the last sentence of paragraph 2 in section 1, where we replaced  
27 "improved" by "efficient".  
28

29 [Referee comment: The ability of high-throughput experiments was mentioned repeatedly in the](#)  
30 [manuscript, and it will be valuable contribution if the authors could use their existing data to](#)  
31 [show if this ability is important.](#)

32 Author's response: TINA is suitable for high-throughput experiments because the instrument  
33 enables the study of ice nucleation in 960 microliter range droplets in one experiment, which  
34 enables the analysis of many samples or dilution series with good statistics in a short period of  
35 time. This is demonstrated in Figure 10, for which aqueous extracts of two aliquots of an  
36 atmospheric aerosol filter sample were treated in three different ways. All treated samples and  
37 untreated controls were measured in five different dilutions to provide the full ice nucleation  
38 spectrum for each sample. Each dilution was measured in 96 droplets, and every sample  
39 consisted of two aliquots. All in all, 4608 droplets were measured for Figure 10, which  
40 correspond to six experiments performed by TINA. For each freezing experiment down to -30  
41 °C, TINA takes about 45 min, which means 4.5 h of operation of TINA for Figure 10.  
42

43 [Referee comment: I also wonder why error bars are lacking from all data and figures.](#)

44 Author's response: The uncertainty of the temperature sensor was used as the error of the  
45 temperature and was added into the figure captions. The error of the IN number concentrations  
46 was calculated using the counting error and the Gaussian error propagation, and error bars of  
47 the IN number concentrations were added into all figures.  
48

49 The section 2.4 was optimized and the following paragraph was included:

50 “Assuming ice nucleation as a time-independent (singular) process, the number concentration  
 51 of IN ( $\frac{\Delta N_m}{\Delta T}$ ) active at a certain temperature ( $T$ ) per unit mass of material is given by Eq. (1)  
 52 (Vali, 1971a).

$$53 \quad \frac{\Delta N_m}{\Delta T}(T) = -\ln\left(1 - \frac{s}{a - \sum_{i=0}^j s}\right) \cdot \frac{c}{\Delta T} \quad ; 0 \leq j \leq a \quad (1)$$

$$54 \quad \text{with } c = \frac{V_{\text{wash}}}{V_{\text{drop}}} \cdot \frac{d}{m} \quad (2)$$

55 where  $s$  is the number of freezing events in 0.1 K bins ( $\Delta T$ ),  $a$  is the number of all droplets,  $m$   
 56 is the mass of the particles in the initial suspension,  $V_{\text{wash}}$  is the volume of the initial suspension,  
 57  $V_{\text{drop}}$  is the droplet volume, and  $d$  is the dilution factor of the droplets relative to  $m$ . The  
 58 measurement uncertainty ( $\delta \frac{\Delta N_m}{\Delta T}(T)$ ) was calculated using the counting error of  $s$  plus one digit  
 59 and the Gaussian error propagation (Eq. (3)).

$$60 \quad \delta \frac{\Delta N_m}{\Delta T}(T) = \sqrt{\left(\frac{1}{1 - \frac{s}{a - \sum_{i=0}^j s}} \cdot \frac{c}{\Delta T} \cdot \frac{\sqrt{s+1}}{a - \sum_{i=0}^j s}\right)^2 + \left(\frac{1}{1 - \frac{s}{a - \sum_{i=0}^j s}} \cdot \frac{c}{\Delta T} \cdot \frac{s \cdot \sqrt{\sum_{i=0}^j s + 1}}{(a - \sum_{i=0}^j s)^2}\right)^2} \quad (3)$$

61 The cumulative IN number concentration ( $N_m(T)$ ) is given by Eq. (4).

$$62 \quad N_m(T) = -\ln\left(1 - \frac{\sum_{i=0}^j s}{a}\right) \cdot c \quad ; 0 \leq j \leq a \quad (4)$$

63 The error of the cumulative IN number concentration ( $\delta N_m(T)$ ) was calculated using Eq. (5).

$$64 \quad \delta N_m(T) = \sqrt{\left(\frac{c}{1 - \frac{\sum_{i=0}^j s}{a}} \cdot \frac{\sqrt{\sum_{i=0}^j s + 1}}{a}\right)^2} \quad (5)$$

65 According to the above equations, the uncertainty is proportional to the number of frozen  
 66 droplets per temperature bin. In the freezing experiments described below, the lowest number  
 67 of freezing events and largest uncertainties were obtained at the lower and higher end of each  
 68 dilution series (Poisson distribution). Data points with uncertainties  $\geq 100\%$  were excluded  
 69 (overall less than 6% of the measurement data).”

70

71

72 Specific comments:

73

74 [Referee comment: Line #26: It is stated that there is a good agreement with literature data.](#)  
 75 [Where was this shown or detailed in the manuscript?](#)

76 Author’s response: In section 3.2, we discussed the results of our experiments with Snomax<sup>®</sup>,  
 77 which are shown in Figures 7 and S4. “These findings are in accordance with the results of  
 78 Budke and Koop (2015).” Here, we replaced “in accordance” with “in good agreement”.

79 In the same section, we also discussed the results of our experiments with *Mortierella alpina*,  
 80 which are shown in Figures 8 and S5. “The cumulative number of IN and the initial freezing  
 81 temperature of 268 K (-5 °C) are in good agreement with the literature (Fröhlich-Nowoisky et  
 82 al., 2015; Pummer et al., 2015).”

83

84 [Referee comment: Line #76: I think it is confusing: up to 10 K min<sup>-1</sup> or more?](#)

85 Author’s response: We tested our setup with continuous cooling rates of up to 10 K min<sup>-1</sup>, but  
 86 it is possible to run the setup at higher cooling rates. But it has to be considered, that for each  
 87 cooling rate a new correction matrix has to be generated. For clarification, we deleted “or  
 88 more”.

89

90 Referee comment: Line #83: Is this the correct place to introduce the similar approach by  
91 Harrison et al.?

92 Author's response: We deleted the sentence "Very recently, a similar approach for droplet  
93 freezing experiments with IR detection has been presented by Harrison et al. (2018),  
94 investigating K-feldspar, NX-illite, and atmospheric aerosol samples." at the end of section 1,  
95 and we modified in section 1: "Infrared (IR) detectors enable efficient detection of droplet  
96 freezing (Harrison et al., 2018; Zaragotas et al., 2016)."

97

98 Referee comment: Line #94: Here it is not clear if the plates are commercial product or self-  
99 designed? If commercial, manufacture details should be specified.

100 Author's response: We added the following sentence: "For each experiment, new sterile  
101 multiwell plates are used (96-well: Axon Laborotechnik Kaiserslautern, Germany, 384-well:  
102 Eppendorf, Hamburg, Germany)."

103

104 Referee comment: Line #137: It confused me that it was cooled to 218.2 K and heated from  
105 220.7 K?

106 Author's response: To clarify this, we modified the sentence: "The temperature within the bath  
107 was cooled down from 303.2 K to 218.2 K (30.0 °C to -55.0 °C) in 5 K steps, warmed to  
108 220.7 K (-52.5 °C), and raised again from 220.7 K to 300.7 K (-52.5 °C to 27.5 °C) in 5 K  
109 steps."

110

111 Referee comment: Section 2.2: So what is the temperature uncertainty of TINA and how was it  
112 propagated?

113 Author's response: The temperature uncertainty of TINA is 0.2 K. We added the following  
114 sentence at the end of section 2.2: "From the calibration measurements, we obtained a total  
115 uncertainty estimate of  $\delta_{\text{total}} < 0.2 \text{ K}$  ( $\delta_{\text{total}} = \delta_{\text{Thermistor}} + \delta_{\text{TC}} + \delta_{\text{Morti}}$ )."

116

117 Referee comment: Line 144: I think it is still not clear at this point what is the temperature  
118 gradient you refer to. I would first defined that.

119 Author's response: We included thermocouple measurements in the individual wells of the  
120 sample holder blocks to correct for a temperature gradient within the two blocks. We added the  
121 following paragraph at the end of section 2.2. and included three new figures (Figure 4, S1, S2,  
122 S3) while renaming the existing. "To determine a potential temperature gradient of the sample  
123 holder blocks, two thermocouples (K type, 0.08 mm diameter, Omega) were positioned in  
124 various wells of multiwell plates (Figure S1a/b), each filled with 30  $\mu\text{L}$  pure water (see Sect.  
125 3.1). These thermocouples were connected to the thermocouple in the elevation of each sample  
126 holder block, and the temperature offset between sample holder block and wells was measured  
127 for a continuous cooling rate of 1  $\text{K min}^{-1}$  (Figure S1c). Below -2 °C, the temperature offset  
128 between sample holder block and wells is nearly constant, in this example  $\sim 0.16 \text{ K}$  and  $\sim 0.19$   
129 K. The measurement was performed in duplicates for all observed wells. Figure S2 shows the  
130 temperature gradient exemplarily for the 384-well sample holder block in a 2D interpolation  
131 based on all measurements.

132 To characterize the uncertainty of this measurement, the two thermocouples were placed in an  
133 ice water bath, and the sample holder block was cooled down to 2 °C, 1 °C, 0 °C, -1 °C, and -  
134 2 °C ( $T_{\text{block}}$ ), while the difference between the ice water and the block temperature was  
135 monitored by the thermocouples ( $T_{\text{diffTC}}$ ) (Figure S3). From these experiments, we obtained  
136 thermocouple uncertainties  $\delta_{\text{TC}} < 0.05 \text{ K}$  ( $\delta_{\text{TC}} = T_{\text{block}} + T_{\text{diffTC}}$ ).

137 Additionally, we used undiluted IN filtrate of *Mortierella alpina* 13A (see Sect. 3.2) as  
138 calibration substance, and a freezing experiment was performed as described for the biological  
139 reference materials (see Sect. 3.2). These results were used to compensate for the temperature

140 gradient, and the thermocouple measurements were used to correct the temperature offset  
141 between gradient-corrected wells and thermistors. A correction matrix was calculated, and this  
142 matrix was used to correct subsequent freezing experiments. Figure 4 shows the results of the  
143 fungal IN filtrate measurement (a) before and (b) after correction. After correction, all fungal  
144 IN filtrate measurements showed a standard deviation of  $< 0.06$  K ( $\delta_{\text{Morti}}$ ). From the calibration  
145 measurements, we obtained a total uncertainty estimate of  $\delta_{\text{total}} < 0.2$  K ( $\delta_{\text{total}} = \delta_{\text{Thermistor}} + \delta_{\text{TC}}$   
146  $+ \delta_{\text{Morti}}$ ).”

147  
148 Referee comment: Line #151: please clarify why do you mention here Zaragotas et al. (2016).  
149 Author’s response: We deleted the sentence “In contrast, Zaragotas et al. (2016) used infrared  
150 camera, which was calibrated only once by the company, to measure the accurate temperature  
151 of each droplet.”

152  
153 Referee comment: Line #152: I think it would be nice if you will add the plate temperature at  
154 the different images.  
155 Author’s response: We thank the referee for this suggestion, and we added the plate temperature  
156 at the different images.

157  
158 Referee comment: Line #157: what is the resolution in which images are taken?  
159 Author’s response: We added the information about the resolution of the images to section 2.3  
160 to specify the method: “The camera has a resolution of 206 x 156 pixels, and it takes ten pictures  
161 per second. These pictures are averaged to one picture per second.”

162  
163 Referee comment: Line #182: Are those new plates? or the same plates described earlier in the  
164 text?  
165 Author’s response: We changed the sentence as follows: “For background measurements, 3  $\mu$ L  
166 aliquots of autoclaved and filtered pure water were pipetted into new sterile multiwell plates by  
167 a liquid handling station.”  
168 Moreover, we added this information in section 2.1.: “For each experiment, new sterile  
169 multiwell plates are used (96-well: Axon Labor Technik Kaiserslautern, Germany, 384-well:  
170 Eppendorf, Hamburg, Germany).”

171  
172 Referee comment: Line #209: Please add a reference to this claim.  
173 Author’s response: We assume that different plates from different manufactures can lead to  
174 differences in freezing because of the production process and well shape, but cannot add a  
175 specific reference. For clarification we changed the sentence as follows: “The 96-well plates  
176 were obtained from a different manufacturer than the 384-well plates.”

177  
178 Referee comment: Line #235: Is this correct? Class A only seen for high suspension  
179 concentrations.  
180 Author’s response: We thank the referee for this comment. We removed the following text:  
181 “These differences result from three different classes of IN with different activation  
182 temperatures as described by Turner et al. (1990). Based on this classification, the Snomax<sup>®</sup>  
183 sample contains a large number of class A and C IN, but only a few IN of class B. These findings  
184 are in accordance with the results of Budke and Koop (2015). Below 259 K (-14 °C), a flat  
185 plateau arises where no IN are active.” and we included the following sentence: “These findings  
186 are in good agreement with the results of Budke and Koop (2015)”

187  
188 Referee comment: Line #302: per liter air? Or liter water.

189 Author's response: The IN concentration was calculated per liter air, which passed the filter  
190 during sampling. We included the following sentence: "All IN concentrations were calculated  
191 per liter air."

192  
193

194 Technical corrections:

195

196 Referee comment: Line #97: Fig. 1b should be describes before Fig. 1c.

197 Author's response: Changed as suggested.

198

199 Referee comment: Line #165: add "is" after Vdrop, and m, and etc..

200 Author's response: We modified the sentence.

201

202 Referee comment: Line #206: You can remove 'respectively'.

203 Author's response: This has been removed.

204

205 Referee comment: Line #209: 'showed' and not 'show'. Also found in other places in the text.

206 Author's response: We replaced it in several places in the text.
